# Supplementary material for: High-performance activated carbon from coconut shells for dye removal: study of isotherm and thermodynamics
Source: Royal Society of Chemistry journal article supplement (doi:10.1039/d4ra06287f), 2024-01-01
Supplement: d4ra06287f1.pdf [file d4ra06287f1.pdf]

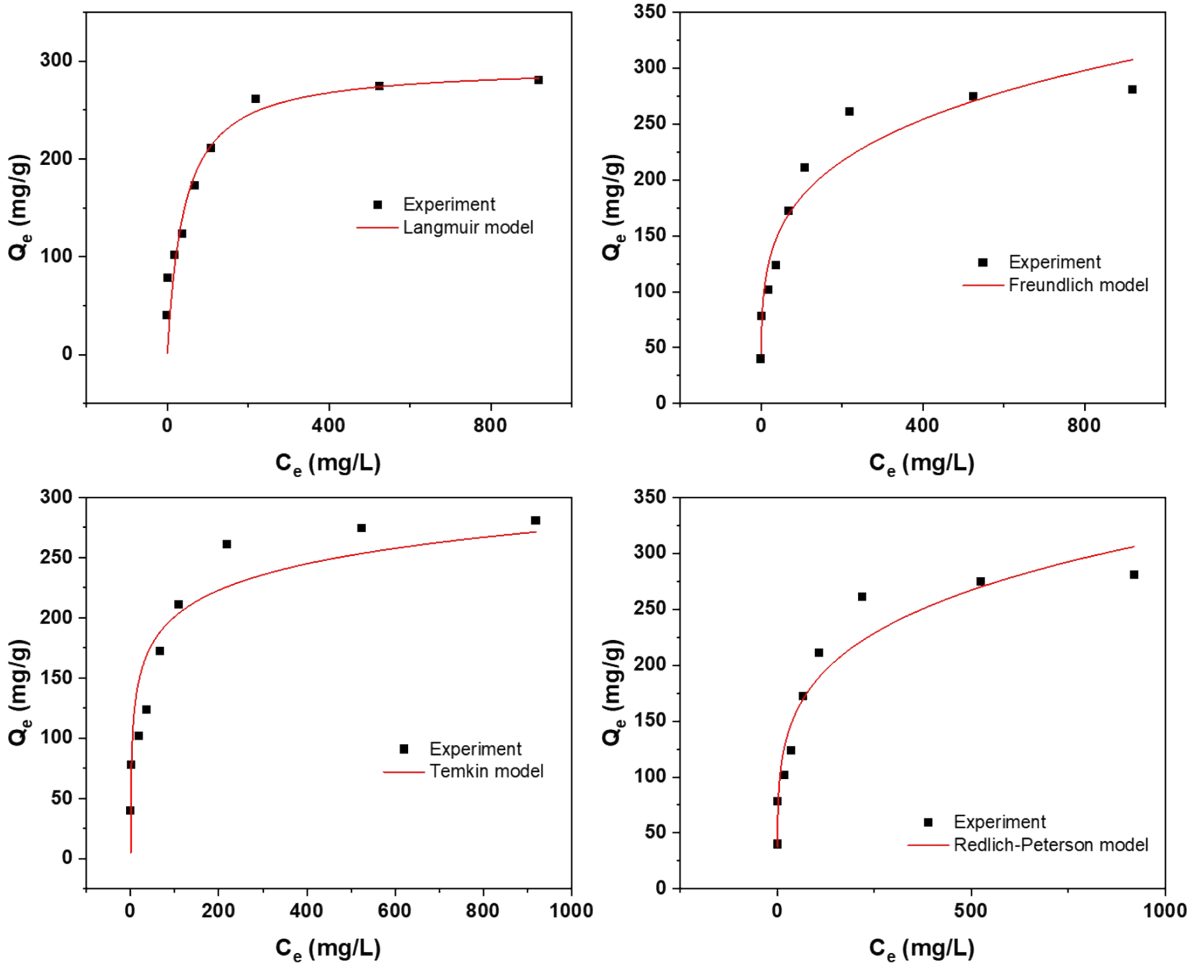

Figure S1: Isotherms for  $H_2SO_4$  activation at 318K

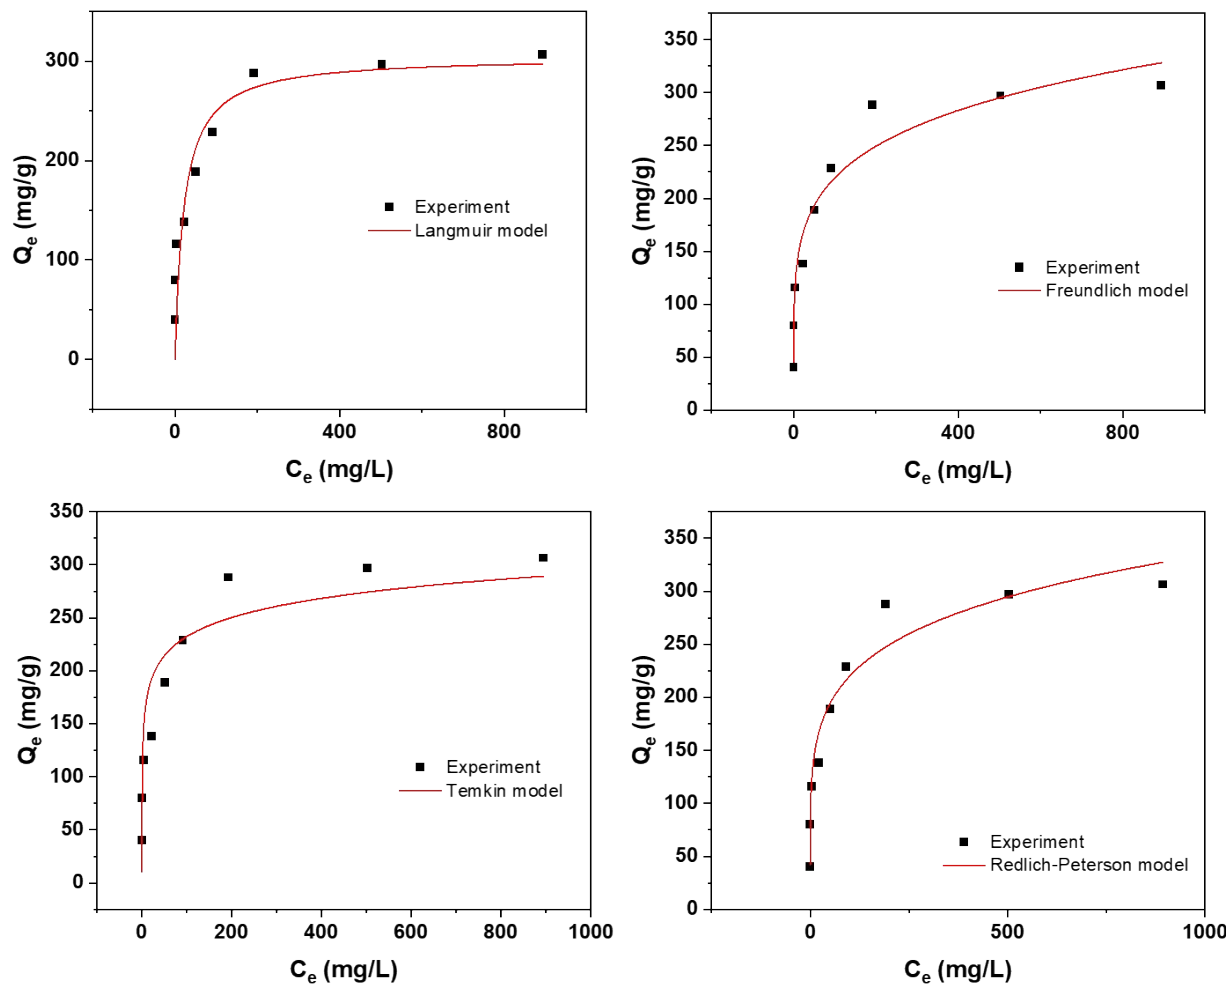

Figure S2: Isotherms for  $H_2SO_4$  activation at 338K

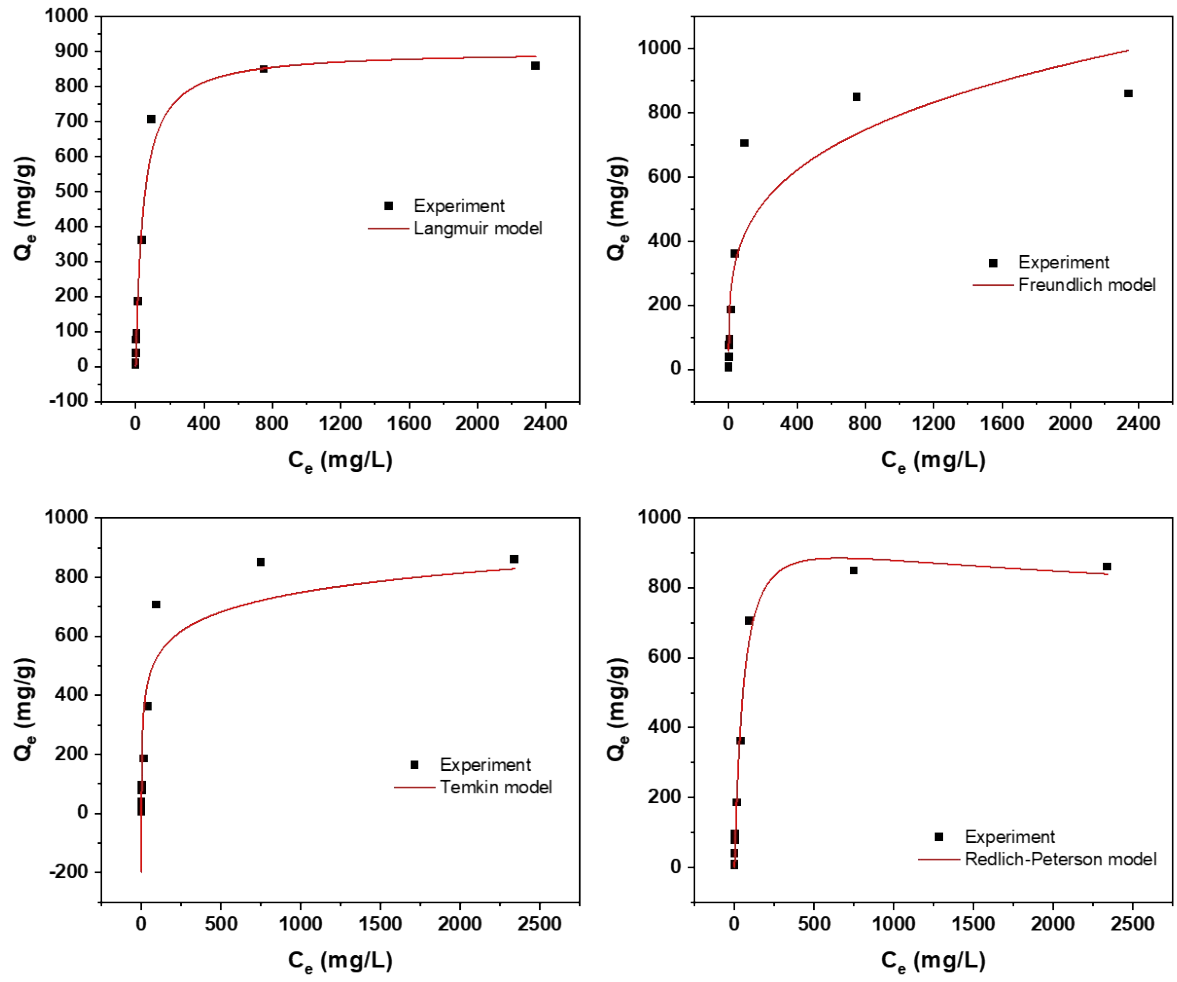

Figure S3: Isotherms for NaOH activation at 318K

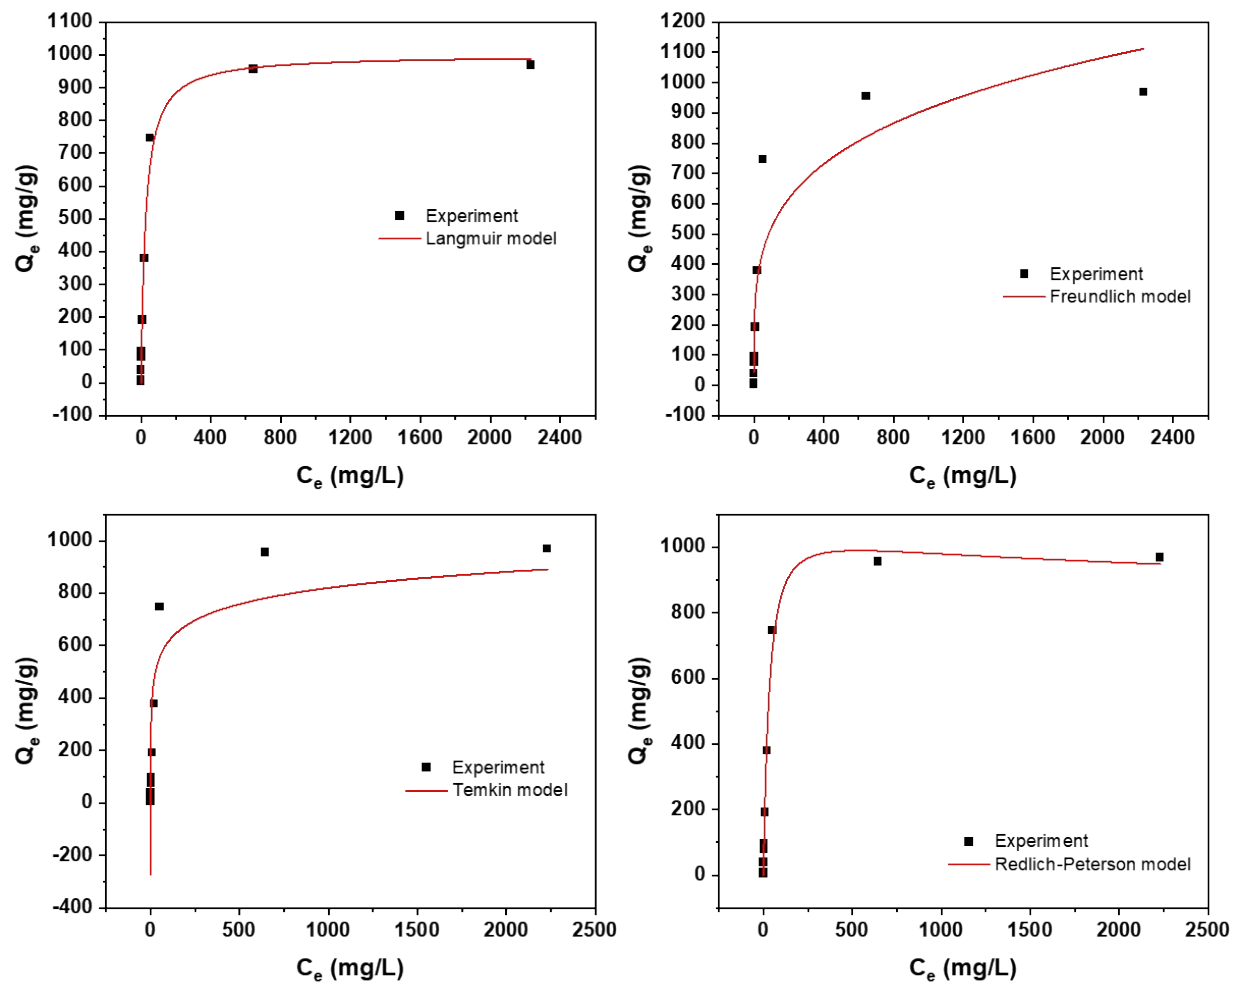

Figure S4: Isotherms for NaOH activation at 338K
